# Supplementary material for: Large grain growth for hole-conductor-free fully printable perovskite solar cells via polyoxometalate molecular doping
Source: Royal Society of Chemistry journal article supplement (doi:10.1039/c6cc08516d), 2017-01-01
Supplement: c6cc08516d1.pdf [file c6cc08516d1.pdf]

# **Large grain growth for hole-conductor-free fully printable perovskite solar cells via polyoxometalate molecular doping**

Yuzhuo Zhang, Yanju Wang, Zhixia Sun, Fengyan Li,\* Ran Tao, Zhanbin Jin, and Lin Xu\*

Key Laboratory of Polyoxometalate Science of Ministry of Education, Department of Chemistry, Northeast Normal University, Changchun, Jilin 130024, P. R. China.

## **Experimental Section**

### **S1. Materials and Synthesis**

CH<sub>3</sub>NH<sub>3</sub>I (MAI) and HOOC(CH<sub>2</sub>)<sub>4</sub>NH<sub>3</sub>I (5-AVAI) were synthesized according to reported procedure:<sup>1</sup> Hydroiodic acid (Sinopharm) together with methylamine (Amethyst) or 5-aminopentanoic acid (Sigma) were added with a mole ratio of 1:1 into round-bottom flask and stirred in the ice bath for 2h. After stirring at 0°C for 2h, the resulting solution was evaporated at 50°C until the solvent completely evaporated and the raw product synthesized. The precipitate was washed three times with diethyl ether and dried at 60°C under vacuum and used without further purification. The (5-AVA)<sub>x</sub>(MA)<sub>1-x</sub>PbI<sub>3</sub> precursor solution was prepared according to literature method.<sup>1</sup> PW<sub>12</sub> was prepared according to literature method.<sup>2</sup> The (5-AVA)<sub>x</sub>(MA)<sub>1-x</sub>PbI<sub>3</sub>/PW<sub>12</sub> precursor was prepared by adding PW<sub>12</sub> into (5-AVA)<sub>x</sub>(MA)<sub>1-x</sub>PbI<sub>3</sub> precursor under continuous stirring until the PW<sub>12</sub> was completely dissolved.

### **S2. Fabrication of perovskite solar cell device**

The hole-conductor-free fully printable mesoscopic solar cell based on a carbon CE is shown in Figure 1a. All of the films in the mesoscopic solar cell were fabricated by the reported method with a little modification.<sup>1</sup> Fluorine-doped tin oxide (FTO) glass was patterned by chemical etching (Zn powder and 2 M HCl) with the bridging-gap

width of roughly 1mm. Then, the etched substrate was cleaned with surfactant and rinsed with acetone and ethanol and deionized water and finally dried by air flow. A compact layer of  $\text{TiO}_2$  was deposited by spin-coating (2000 rpm/min) from a precursor solution to act as a hole-blocking layer.<sup>3</sup> The mesoscopic  $\text{TiO}_2$  layer was deposited by screen-printing of a  $\text{TiO}_2$  slurry (P25 Degussa) and then sintered at 450 °C for 30min.<sup>4</sup> A 1-2 $\mu\text{m}$   $\text{ZrO}_2$  space layer was printed on the top of the  $\text{TiO}_2$  layer using a  $\text{ZrO}_2$  slurry, which acts as an insulating layer to prevent electrons from reaching the back contact. Finally, a carbon black/graphite counter electrode with the thickness of about 10 $\mu\text{m}$  was coated on the top of  $\text{ZrO}_2$  layer by printing carbon/graphite composite slurry and consequently heating at 400 °C for 30min. After that, the resulting films were infiltrated with a 40wt% perovskite precursor solution by dropping on the top of the carbon counter electrode. The ultimate mesoscopic solar cells containing perovskite were obtained after drying at 50 °C for two hours. All these procedures were carried out on naturally ambient air and room temperature.

## Characterization

Infrared spectra (IR) were recorded with a Nicolet Magna 560 FT-IR Spectrometer. X-ray diffraction (XRD) analyses were performed with a Rigaku D/max-3c X-ray diffractometer, using  $\text{CuK}\alpha 1$  radiation ( $\lambda=1.5405\text{\AA}$ ). Field-emission scanning electron microscopy (Hitachi SU-8010 FE-SEM) was used to investigate the surface and cross-section morphology. The photocurrent–voltage (J–V) characteristics of the solar cells with an active area of 0.07  $\text{cm}^2$  were measured using a Keithley 2400 Source Meter under illumination of a simulated sunlight (AM1.5, 100mW/ $\text{cm}^2$ ). The External quantum efficiency (EQE) spectra were measured by a Model QE/IPCE system (PV Measurements, Inc.) in the 350-800nm wavelength range. Electrochemical impedance spectroscopy (EIS) was performed on a CHI660C electrochemical workstation (Shanghai, China). The fluorescence spectra were

recorded on the FL900/FS920 steady-state fluorescence spectrometer. The UV-vis diffuse reflectance spectroscopy (DRS) was recorded with a UV-Vis-NIR Spectrophotometer (Varian).

## Figures and Comments

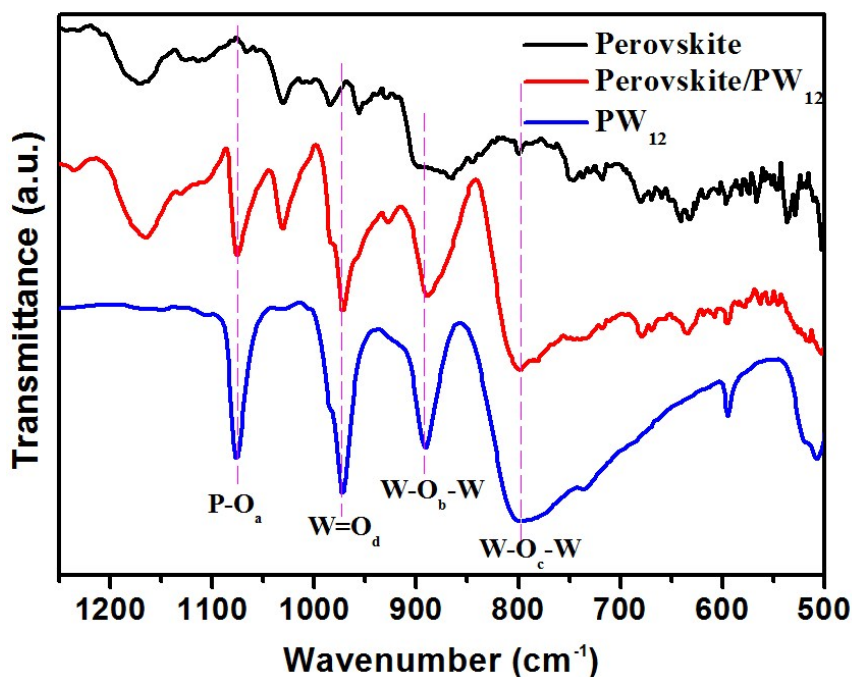

**Figure S1. IR spectra. Dash lines denote characteristic peaks of POMs.**

Figure S1 displayed the IR spectra of the pure  $(5\text{-AVA})_x(\text{MA})_{1-x}\text{PbI}_3$  and the  $(5\text{-AVA})_x(\text{MA})_{1-x}\text{PbI}_3/\text{PW}_{12}$  composite. In comparison with the  $(5\text{-AVA})_x(\text{MA})_{1-x}\text{PbI}_3$  curve, the  $(5\text{-AVA})_x(\text{MA})_{1-x}\text{PbI}_3/\text{PW}_{12}$  curve exhibits characteristic bands for the  $\text{PW}_{12}$  at 700-1100  $\text{cm}^{-1}$ . The characteristic peaks observed at 1080, 983, 890, and 798  $\text{cm}^{-1}$  were assigned to  $\nu_{\text{as}}(\text{P-O})$ ,  $\nu_{\text{as}}(\text{W=O})$  and  $\nu_{\text{as}}(\text{W-O-W})$ , respectively, suggesting that the Keggin structure of the  $\text{PW}_{12}$  was retained in the composite.

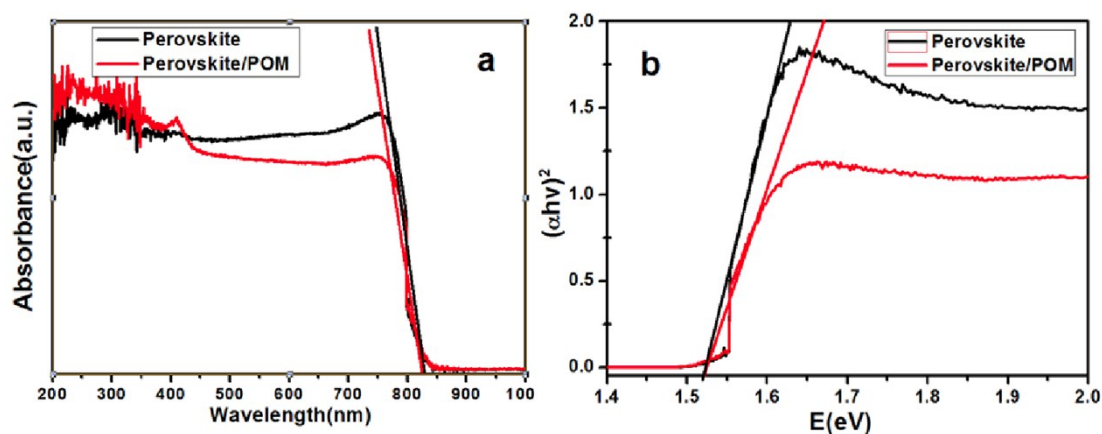

**Figure S2. UV-vis diffuse reflectance spectra (a) and  $(\alpha h\nu)^2$  versus light energy curves (b) of the perovskite with and without POM**

As displayed in Figure S2(a), the UV-vis absorbance spectra of both the pure  $(5\text{-AVA})_x(\text{MA})_{1-x}\text{PbI}_3$  and  $(5\text{-AVA})_x(\text{MA})_{1-x}\text{PbI}_3/\text{PW}_{12}$  exhibited high light-harvesting capabilities in the spectral range from the ultraviolet to visible light. The absorption onsets of the both samples were ca. 830nm. Besides, both the curves show clear band edge cutoffs, indicating high-quality crystals with low defect concentration. Furthermore, The bandgap value was obtained on the basis of the Tauc plot as the intercept value of the plot of  $(\alpha h\nu)^2$  against light energy ( $E$ ). By fitting the linear region of the  $(\alpha h\nu)^2$  to the energy-axis ( $h\nu$ ) intercept as shown in Figure S2(b), The band gap ( $E_g$ ) is obtained. Since  $\text{PW}_{12}$  is highly transparent in most spectral ranges, the incorporation of  $\text{PW}_{12}$  did not affect the light adsorption of  $(5\text{-AVA})_x(\text{MA})_{1-x}\text{PbI}_3$ . Thus, the  $E_g$  of  $\text{PW}_{12}$  doped perovskite remain the same as the pristine perovskite ( ca. 1.53eV).

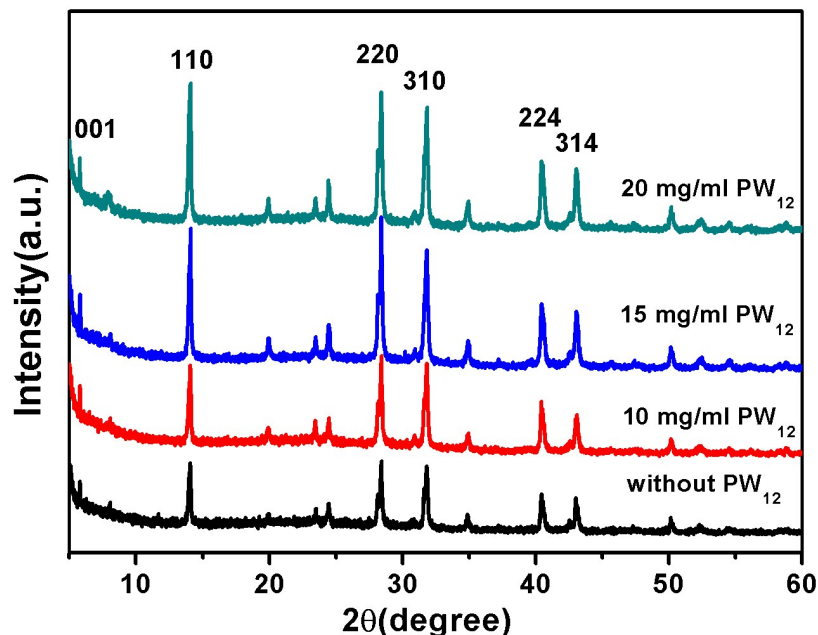

**Figure S3. XRD patterns of the perovskite from 1ml precursor with 0mg, 10mg, 15mg and 20mg  $\text{PW}_{12}$  additive.**

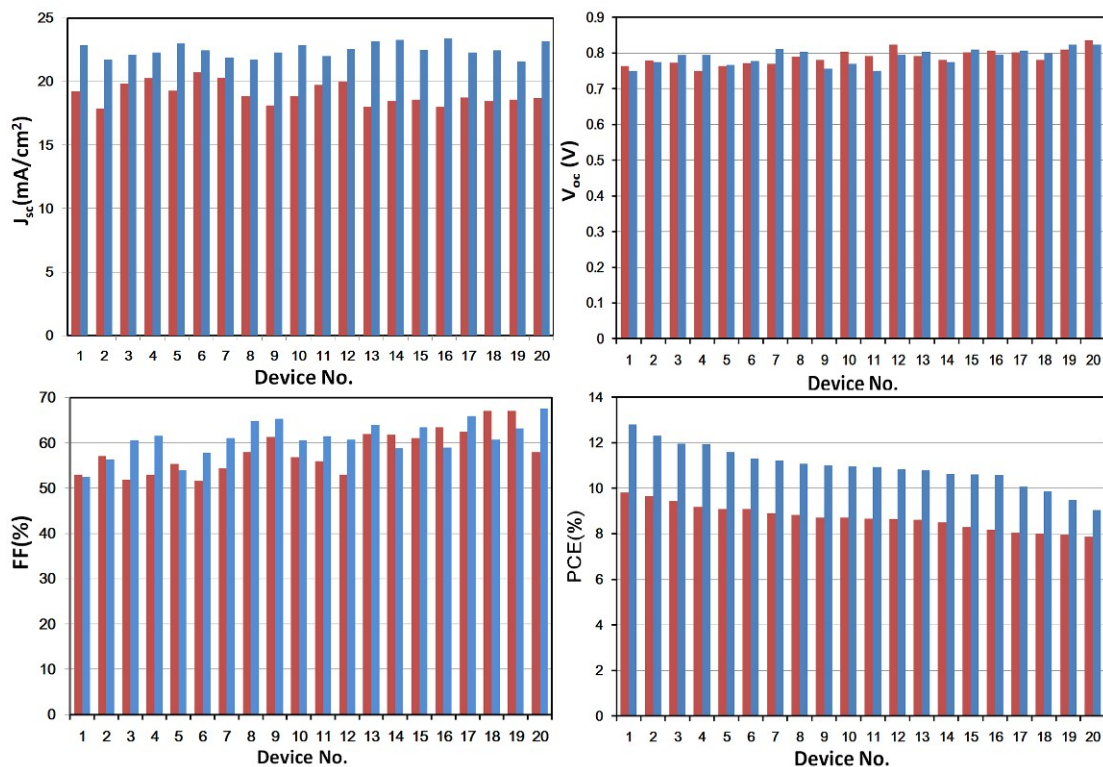

Figure S4. Statistics of photovoltaic characteristics of devices using 20 pristine  $(5\text{-AVA})_x(\text{MA})_{1-x}\text{PbI}_3$  based devices (red) and 20  $\text{PW}_{12}$  additive devices (blue, 15mg/ml).

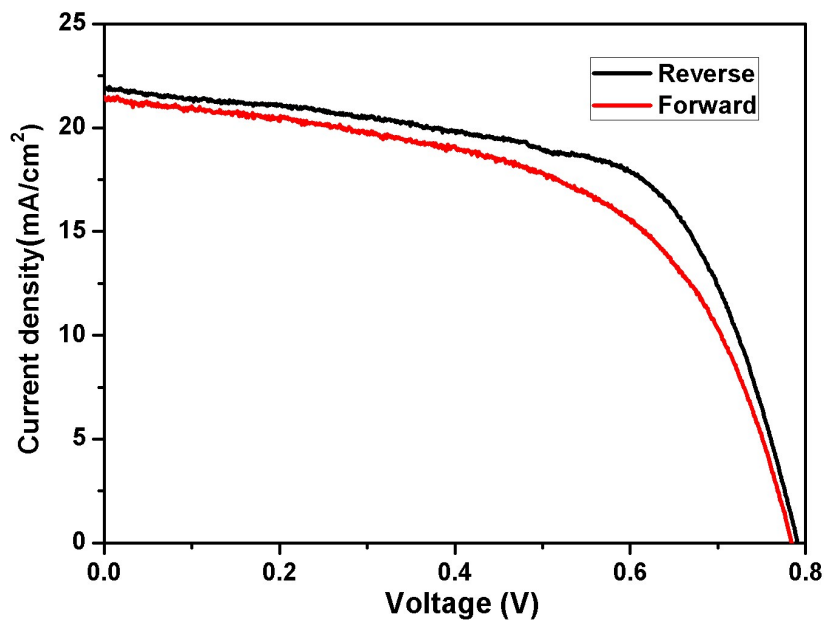

Figure S5. J-V curves of PSCs with  $\text{PW}_{12}$  at different scanning directions: forward bias scan from 0V to  $V_{oc}$  and back to 0V. The scanning rate was 10 mV/s.

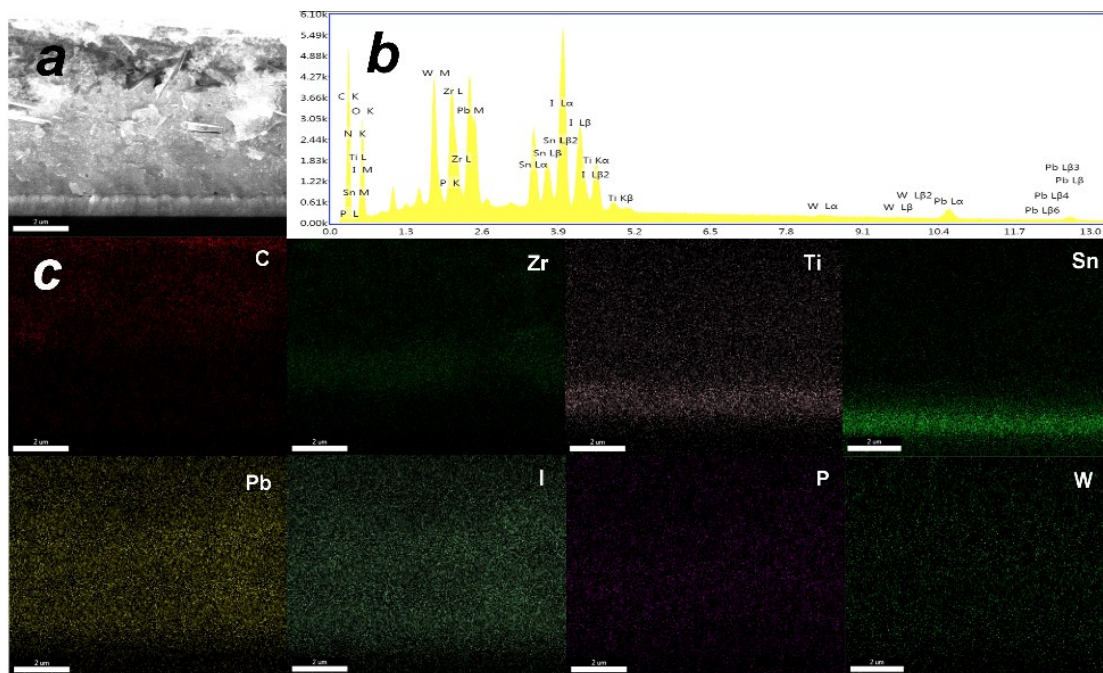

**Figure S6.** SEM from the cross section of the PSC device (a) with the EDX diagram (b), and the corresponding EDX elemental mappings (C, Zr, Ti, Sn, Pb, I, P and W). Note the white scale bar correspond to 2 μm.

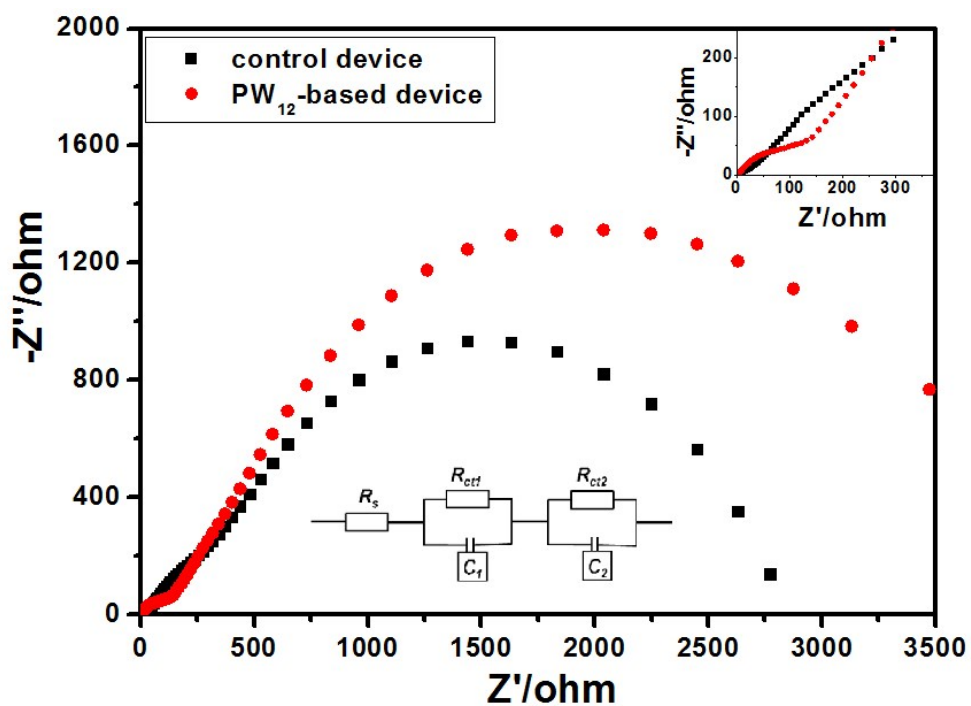

**Figure S7.** Nyquist plots of the devices with and without  $PW_{12}$  additive.

Electrochemical impedance spectroscopy (EIS) was carried out under dark condition at 0.1V in the frequency range from 0.1 to 100 kHz.

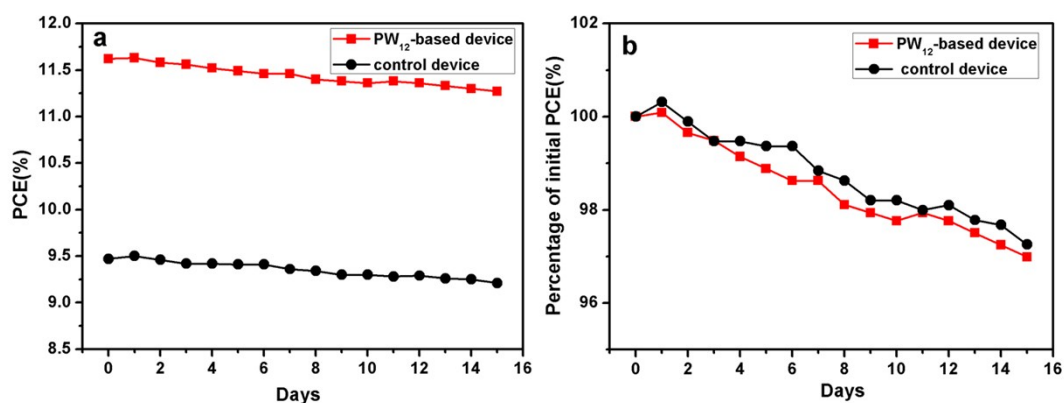

**Figure S8. (a) Real PCEs as a function of time for PSCs with (15mg/ml) and without  $PW_{12}$ . (b) Normalized PCEs of PSCs as a function of time with and without  $PW_{12}$ . After each  $J-V$  measurement, the device was removed from light illumination and stored in the ambient air without encapsulation. The humidity of the atmosphere was ca. 30%.**

The efficiency was periodically measured to check the long-term stability. The humidity of the atmosphere was ca. 30%. As shown in Figure S8, both the control device and  $PW_{12}$  doped device exhibited negligible degradation (<3%) upon exposure to air conditions after 15 days. In the device based on fully-printable technology, the 10- $\mu$ m-thick carbon counter electrode can act as a water retaining layer, which also endows the device with excellent stability even without any encapsulation treatment. The control device retained 97.3% of its initial PCE after storage for 15 days. Similarly, PSCs doped with  $PW_{12}$  maintained 97.0% of its initial PCE value during the same aging period. Both the resulting devices exhibit promising long-term ambient stability, with negligible (<3%) loss in PCE. Therefore, although the large-grained perovskite film growth induced by POM should be dominantly responsible for the performance enhancement, the  $PW_{12}$  makes no distinct contributions to the improvement of the long-term stability.

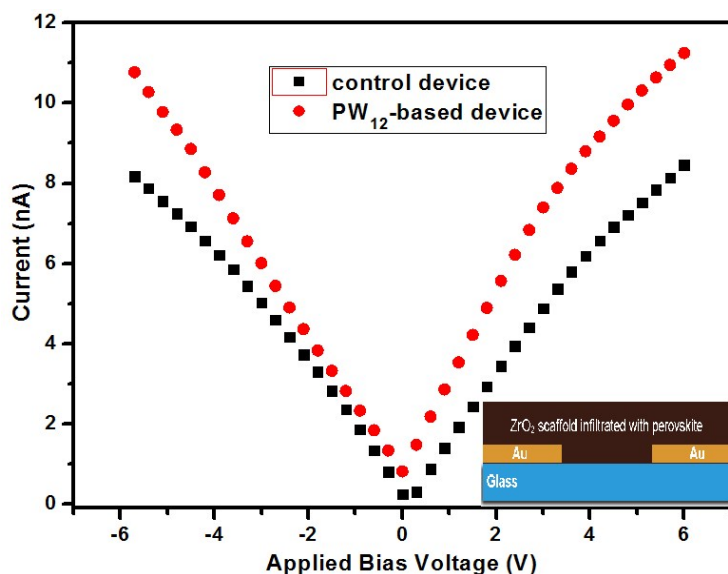

**Figure S9. I - V characteristics of the in-plane hole-only device employing pristine and  $PW_{12}$  doped (15mg/ml) perovskite layers in dark. Inset: Schematic illustration of the device structure (Au/perovskite/Au).**



To characterize the hole transport through perovskite within the mesoporous film in Han's fully printable architecture, the in-plane hole-only devices were fabricated by screen-printing mesoporous  $\text{ZrO}_2$  scaffold layer onto the Au deposited substrate, constituting the hole-only device with the symmetric structure of Au/perovskite/Au.<sup>5-6</sup> The substrate was fabricated by deposition of a 150nm thick Au layer on glass with a channel width of 100 $\mu\text{m}$  via thermal vacuum evaporation, and then the channel were filled with the perovskite sample. Since the work function of Au is 5.1eV versus vacuum level, which is closed to the HOMO level of perovskite (5.43eV), the major charge carrier should be holes. The injected electrons are negligible and the device acts as unipolar device.<sup>7-10</sup>

The conductivities of the pristine and  $\text{PW}_{12}$  doped perovskite were evaluated by the equation (1), where  $L$  is the channel length (100 $\mu\text{m}$ ),  $w$  is the channel width (1.4cm),  $t$  is the film thickness (150nm) and  $R$  is the film resistance calculated from the gradients of the curves.<sup>8</sup>

$$\sigma = L/Rwt \quad (1)$$

The obtained conductivity ( $\sigma$ ) were  $1.9 \times 10^{-9} \text{ S}\cdot\text{cm}^{-1}$  and  $1.35 \times 10^{-9} \text{ S}\cdot\text{cm}^{-1}$  for  $\text{PW}_{12}$  doped perovskite and pristine perovskite infiltrated mesoporous  $\text{ZrO}_2$  layers respectively. Based on the hole-only device, the conductivity of a material ( $\sigma$ ) is equal to the product  $ne\mu$ , where  $n$  is the hole density,  $e$  is the charge of an hole and  $\mu$  is the hole mobility.<sup>10</sup> The enhancement in conductivity observed from the  $\text{PW}_{12}$ -based hole-only device may be due to both the increased hole charge density and the enhanced hole mobility, suggesting that the large-grained perovskite film with higher crystallinity is indeed capable of reducing crystal grain defects and facilitating charge transport.

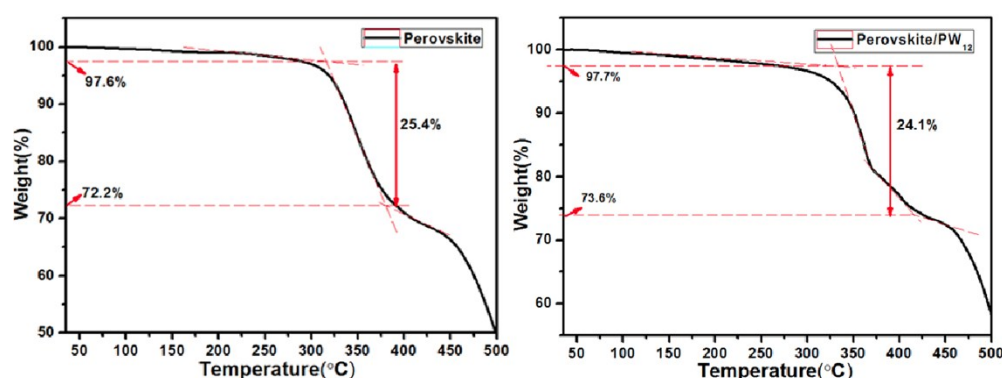

**Figure S10. Thermogravimetric analysis (TGA) data of the pure  $(5\text{-AVA})_x(\text{MA})_{1-x}\text{PbI}_3$  perovskite and the  $\text{PW}_{12}$ -doped  $(5\text{-AVA})_x(\text{MA})_{1-x}\text{PbI}_3$  perovskite.**

**Figure S11. The films of both the pure perovskite and the  $\text{PW}_{12}$ -doped perovskite**

Temperature: 150°C 155°C 160°C 165°C 170°C

$\text{PW}_{12}$ -doped  
perovskite

perovskite

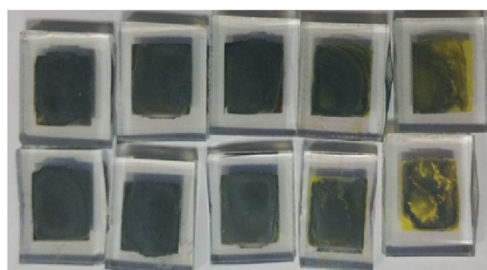



were heated at 165°C for 30min, the color changes (black to yellow) indicated that the perovskite (black color) degraded to PbI<sub>2</sub> (yellow color). The thermal decomposition temperature of both the pure and the PW<sub>12</sub>-doped were *ca.* 165°C.

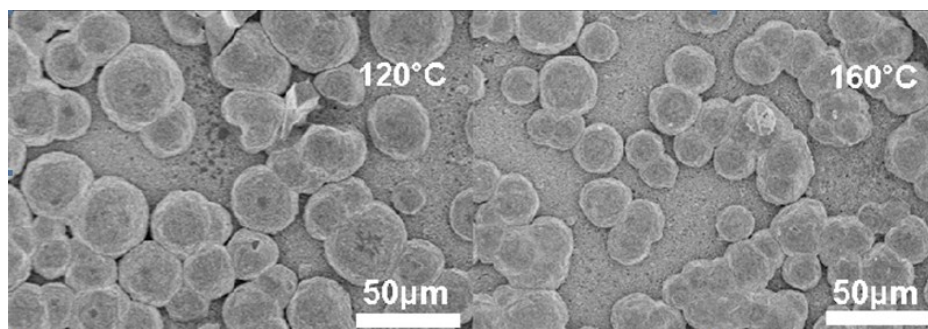

**Figure S12.** SEM photomicrograph of the morphology of the large grained perovskite films heated at 120°C and 160°C.

**Table S1** Values for time-resolved PL characteristics by fitting the decay curves.

| Precursor | $\tau_1$ (ns) | $f_1$ (%) | $\tau_2$ (ns) | $f_2$ (%) | Average $\tau$ (ns) |
|-----------|---------------|-----------|---------------|-----------|---------------------|
| 0mg/ml    | 1.75          | 58.60     | 23.74         | 41.4      | 10.86               |
| 10mg/ml   | 2.75          | 39.91     | 33.60         | 60.09     | 21.29               |
| 15mg/ml   | 1.46          | 18.98     | 34.48         | 81.02     | 28.22               |
| 20mg/ml   | 3.02          | 27.55     | 44.69         | 72.45     | 33.21               |

**Table S2** Photovoltaic performance parameters of devices fabricated with different PW<sub>12</sub> concentrations of precursors.

| Precursor | $J_{sc}$ (mA·cm <sup>2</sup> ) | $V_{oc}$ (mV) | $FF$ | PCE (%) |
|-----------|--------------------------------|---------------|------|---------|
| 0mg/ml    | 18.00                          | 807           | 0.63 | 9.17    |
| 10mg/ml   | 19.57                          | 810           | 0.61 | 9.67    |
| 15mg/ml   | 22.57                          | 801           | 0.62 | 11.35   |
| 20mg/ml   | 21.86                          | 797           | 0.60 | 10.52   |

## References

1. A. Y. Mei, et al., *Science*, 2014, **345**, 295–298.
2. H., Wu, *J. Biol. Chem.*, 1920, **43**, 189.
3. A. Abrusci, et al., *Nano Lett.*, 2013, **13**, 3124.
4. Y. G. Rong, et al., *J. Phys. Chem. Lett.* 2014, **5**, 2160.
5. Q. F. Dong, et al., *Science*, 2015, **347**, 6225.
6. Y. C. Liu, et al., *Adv. Mater.* 2015, **27**, 5176.
7. P.S. Rudati et al., *J. Appl. Res. Technol.*, 2015, **13**, 253.
8. H. J. Snaith, et al., *Appl. Phys. Lett.*, 2006, **89**, 262114.
9. S. D. Sung, et al., *Chem. Commun.*, 2014, **50**, 14161.
10. H. J. Snaith, et al., *Adv. Mater.*, 2007, **19**, 3643.
